# Supplementary material
Source: PubMed Central journal article supplement (PMC6946906)
Supplement: NIHMS1530482-supplement-1.pdf [file NIHMS1530482-supplement-1.pdf]

Supplemental Table 1: Presence of Radiographic Pneumonia Stratified by Pre-Radiograph Suspicion for Pneumonia

|                                                                             | <b>No<br/>Radiographic<br/>Pneumonia<br/>(n=162)</b> | <b>Radiographic<br/>Pneumonia<br/>(n=27)</b> | <b>Percentage at<br/>given probability<br/>with radiographic<br/>pneumonia</b> |
|-----------------------------------------------------------------------------|------------------------------------------------------|----------------------------------------------|--------------------------------------------------------------------------------|
| Clinician's Rating of the Probability of Finding<br>Pneumonia on CXR (n, %) |                                                      |                                              |                                                                                |
| <1%                                                                         | 39 (24.1)                                            | 4 (14.8)                                     | 9%                                                                             |
| 1-5%                                                                        | 59 (36.4)                                            | 6 (22.2)                                     | 9%                                                                             |
| 5-10%                                                                       | 19 (11.7)                                            | 3 (11.1)                                     | 14%                                                                            |
| 10-25%                                                                      | 20 (12.4)                                            | 3 (11.1)                                     | 13%                                                                            |
| 25-50%                                                                      | 11 (6.8)                                             | 4 (14.8)                                     | 27%                                                                            |
| 50-75%                                                                      | 13 (8.0)                                             | 3 (11.1)                                     | 19%                                                                            |
| 75-100%                                                                     | 1 (0.6)                                              | 4 (14.8)                                     | 80%                                                                            |
